# Supplementary material for: Nutritional Values of Minikiwi Fruit (Actinidia arguta) after Storage: Comparison between DCA New Technology and ULO and CA
Source: MDPI journal article supplement (doi:10.3390/molecules27134313), 2022-07-05
Supplement: s1 [file s1]

**Table S1.** Changes in antioxidants activity (mg vit C-100 g<sup>-1</sup> F.W.), measured in ‘Geneva’ and ‘Ananasnaya’ minikiwi fruit.

| Cultivars  | Storage<br>Condition<br>s | Period of Storage (Weeks) |             |             |             |             |             |
|------------|---------------------------|---------------------------|-------------|-------------|-------------|-------------|-------------|
|            |                           | 0                         | 4           | 6           | 8           | 10          | 12          |
| Geneva     | 2017                      |                           |             |             |             |             |             |
|            | DCA                       |                           | 0.69 ± 0.11 | 0.76 ± 0.02 | 0.71 ± 0.06 | 0.63 ± 0.06 | 0.64 ± 0.06 |
|            | ULO                       | 0.85 ± 0.05               | 0.76 ± 0.03 | 0.71 ± 0.02 | 0.69 ± 0.15 | 0.68 ± 0.02 | 0.55 ± 0.04 |
|            | CA                        |                           | 0.79 ± 0.10 | 0.64 ± 0.04 | 0.75 ± 0.04 | 0.75 ± 0.04 | 0.78 ± 0.02 |
|            | 2018                      |                           |             |             |             |             |             |
|            | DCA                       |                           | 1.01 ± 0.14 | 1.04 ± 0.07 | 1.06 ± 0.08 | 0.89 ± 0.07 | 0.90 ± 0.07 |
|            | ULO                       | 1.15 ± 0.12               | 1.06 ± 0.05 | 1.08 ± 0.04 | 1.04 ± 0.19 | 0.98 ± 0.05 | 0.80 ± 0.05 |
|            | CA                        |                           | 1.18 ± 0.15 | 0.96 ± 0.07 | 1.13 ± 0.12 | 1.07 ± 0.05 | 1.11 ± 0.07 |
| Ananasnaya | 2017                      |                           |             |             |             |             |             |
|            | DCA                       |                           | 0.76 ± 0.09 | 0.75 ± 0.03 | 0.71 ± 0.03 | 0.69 ± 0.03 | 0.63 ± 0.04 |
|            | ULO                       | 0.80 ± 0.06               | 0.73 ± 0.07 | 0.62 ± 0.02 | 0.69 ± 0.15 | 0.60 ± 0.07 | 0.62 ± 0.04 |
|            | CA                        |                           | 0.85 ± 0.04 | 0.77 ± 0.02 | 0.83 ± 0.06 | 0.81 ± 0.02 | 0.83 ± 0.06 |
|            | 2018                      |                           |             |             |             |             |             |
|            | DCA                       |                           | 0.82 ± 0.09 | 0.82 ± 0.01 | 0.81 ± 0.03 | 0.82 ± 0.02 | 0.75 ± 0.01 |
|            | ULO                       | 0.94 ± 0.07               | 0.80 ± 0.06 | 0.78 ± 0.04 | 0.76 ± 0.11 | 0.63 ± 0.02 | 0.71 ± 0.03 |
|            | CA                        |                           | 0.94 ± 0.05 | 0.87 ± 0.04 | 0.92 ± 0.08 | 0.92 ± 0.03 | 0.95 ± 0.04 |

DCA, dynamic controlled atmosphere, 0.4% CO<sub>2</sub>:0.4% O<sub>2</sub>; ULO, ultra-low oxygen, 1.5% CO<sub>2</sub>:1.5% O<sub>2</sub>; CA, controlled atmosphere, 5% CO<sub>2</sub>:1.5% O<sub>2</sub>; data are presented as mean ± standard deviation.

**Table S2.** Changes in ascorbic acid ( $\text{mg} \cdot 100 \text{ g}^{-1} \text{ F.W.}$ ), measured in ‘Geneva’ and ‘Ananasnaya’ minikiwi fruit.

| Cultivars  | Storage Conditions | Period of Storage (Weeks) |                 |                 |                 |                 |                 |
|------------|--------------------|---------------------------|-----------------|-----------------|-----------------|-----------------|-----------------|
|            |                    | 0                         | 4               | 6               | 8               | 10              | 12              |
| Geneva     | 2017               |                           |                 |                 |                 |                 |                 |
|            | DCA                |                           | $57.1 \pm 6.61$ | $59.4 \pm 0.51$ | $58.6 \pm 1.46$ | $53.3 \pm 0.72$ | $50.6 \pm 0.72$ |
|            | ULO                | $67.8 \pm 6.12$           | $62.6 \pm 1.68$ | $54.9 \pm 1.56$ | $54.1 \pm 9.20$ | $50.5 \pm 0.79$ | $47.5 \pm 0.79$ |
|            | CA                 |                           | $67.2 \pm 5.62$ | $59.9 \pm 3.37$ | $66.5 \pm 8.65$ | $63.0 \pm 0.33$ | $61.8 \pm 0.36$ |
|            | 2018               |                           |                 |                 |                 |                 |                 |
|            | DCA                |                           | $64.6 \pm 7.51$ | $67.1 \pm 0.57$ | $66.3 \pm 1.61$ | $60.4 \pm 0.87$ | $57.3 \pm 0.83$ |
|            | ULO                | $70.1 \pm 2.95$           | $70.9 \pm 1.87$ | $62.1 \pm 1.79$ | $61.2 \pm 10.4$ | $57.2 \pm 0.95$ | $53.7 \pm 0.90$ |
|            | CA                 |                           | $76.0 \pm 6.37$ | $67.9 \pm 3.80$ | $75.3 \pm 9.77$ | $71.3 \pm 0.38$ | $69.9 \pm 0.41$ |
| Ananasnaya | 2017               |                           |                 |                 |                 |                 |                 |
|            | DCA                |                           | $73.2 \pm 5.73$ | $70.6 \pm 3.78$ | $73.5 \pm 2.56$ | $65.7 \pm 0.96$ | $62.1 \pm 0.96$ |
|            | ULO                | $85.3 \pm 8.06$           | $70.0 \pm 4.22$ | $65.9 \pm 1.59$ | $66.3 \pm 11.0$ | $58.9 \pm 1.24$ | $54.3 \pm 1.24$ |
|            | CA                 |                           | $84.4 \pm 4.53$ | $81.2 \pm 5.61$ | $84.4 \pm 14.1$ | $82.8 \pm 0.17$ | $82.2 \pm 0.15$ |
|            | 2018               |                           |                 |                 |                 |                 |                 |
|            | DCA                |                           | $59.9 \pm 9.61$ | $61.6 \pm 0.97$ | $59.1 \pm 2.92$ | $60.0 \pm 2.52$ | $57.8 \pm 3.02$ |
|            | ULO                | $70.2 \pm 8.30$           | $60.3 \pm 4.09$ | $56.1 \pm 5.33$ | $58.4 \pm 3.73$ | $47.5 \pm 5.30$ | $51.2 \pm 4.48$ |
|            | CA                 |                           | $75.2 \pm 3.92$ | $65.4 \pm 6.47$ | $70.3 \pm 11.2$ | $69.4 \pm 1.13$ | $72.6 \pm 3.37$ |

DCA, dynamic controlled atmosphere, 0.4% CO<sub>2</sub>:0.4% O<sub>2</sub>; ULO, ultra-low oxygen, 1.5% CO<sub>2</sub>:1.5% O<sub>2</sub>; CA, controlled atmosphere, 5% CO<sub>2</sub>:1.5% O<sub>2</sub>; data are presented as mean  $\pm$  standard deviation.

**Table S3.** Changes in TPC (mg ·100 g<sup>-1</sup> F.W.), measured in ‘Geneva’ and ‘Ananasnaya’ minikiwi fruit.

| Cultivars  | Storage<br>Condition<br>s | Period of Storage (Weeks) |              |              |               |              |              |
|------------|---------------------------|---------------------------|--------------|--------------|---------------|--------------|--------------|
|            |                           | 0                         | 4            | 6            | 8             | 10           | 12           |
| Geneva     | 2017                      |                           |              |              |               |              |              |
|            | DCA                       |                           | 93.1 ± 1.67  | 85.3 ± 2.42  | 88.4 ± 9.46   | 87.4 ± 1.05  | 84.4 ± 1.35  |
|            | ULO                       | 110.1 ± 7.42              | 92.1 ± 2.25  | 86.6 ± 5.91  | 94.7 ± 12.2   | 78.1 ± 1.48  | 72.2 ± 1.11  |
|            | CA                        |                           | 110.5 ± 6.85 | 109.0 ± 7.11 | 109.8 ± 16.8  | 110.3 ± 0.19 | 109.3 ± 0.56 |
|            | 2018                      |                           |              |              |               |              |              |
|            | DCA                       |                           | 107.3 ± 1.91 | 98.2 ± 2.73  | 101.8 ± 10.8  | 97.1 ± 1.36  | 92.5 ± 1.65  |
|            | ULO                       | 120.1 ± 0.99              | 106.1 ± 2.77 | 99.5 ± 6.77  | 110.3 ± 15.73 | 93.5 ± 1.45  | 87.9 ± 1.14  |
|            | CA                        |                           | 127.3 ± 7.94 | 125.7 ± 8.16 | 126.5 ± 19.3  | 126.9 ± 0.24 | 125.9 ± 0.50 |
| Ananasnaya | 2017                      |                           |              |              |               |              |              |
|            | DCA                       |                           | 82.3 ± 6.45  | 76.3 ± 2.97  | 78.31 ± 14.95 | 80.9 ± 6.22  | 75.5 ± 2.19  |
|            | ULO                       | 101.9 ± 7.90              | 85.2 ± 2.10  | 82.5 ± 8.42  | 95.8 ± 19.1   | 70.7 ± 1.12  | 65.9 ± 0.99  |
|            | CA                        |                           | 105.9 ± 5.41 | 102.2 ± 7.29 | 105.7 ± 17.6  | 90.6 ± 0.31  | 90.2 ± 0.05  |
|            | 2018                      |                           |              |              |               |              |              |
|            | DCA                       |                           | 88.1 ± 5.50  | 82.1 ± 3.8   | 82.6 ± 16.1   | 80.3 ± 4.18  | 75.0 ± 0.66  |
|            | ULO                       | 106.1 ± 7.98              | 90.8 ± 1.16  | 87.9 ± 8.70  | 101.9 ± 18.4  | 85.8 ± 2.40  | 78.3 ± 1.16  |
|            | CA                        |                           | 109.2 ± 9.37 | 109.5 ± 6.84 | 114.5 ± 17.9  | 102.4 ± 2.64 | 103.5 ± 2.74 |

DCA, dynamic controlled atmosphere, 0.4% CO<sub>2</sub>:0.4% O<sub>2</sub>; ULO, ultra-low oxygen, 1.5% CO<sub>2</sub>:1.5% O<sub>2</sub>; CA, controlled atmosphere, 5% CO<sub>2</sub>:1.5% O<sub>2</sub>; data are presented as mean ± standard deviation; TPC, total phenolic content.

**Table S4.** Changes in phenolic acids (mg ·100 g<sup>-1</sup> F.W.), measured in ‘Geneva’ and ‘Ananasnaya’ minikiwi fruit.

| Cultivars  | Storage Conditions | Period of Storage (Weeks) |             |             |             |             |             |
|------------|--------------------|---------------------------|-------------|-------------|-------------|-------------|-------------|
|            |                    | 0                         | 4           | 6           | 8           | 10          | 12          |
| Geneva     | 2017               |                           |             |             |             |             |             |
|            | DCA                |                           | 2.02 ± 0.11 | 1.78 ± 0.09 | 1.89 ± 0.12 | 1.90 ± 0.05 | 1.70 ± 0.01 |
|            | ULO                | 2.32 ± 0.14               | 2.11 ± 0.12 | 1.90 ± 0.15 | 1.94 ± 0.22 | 1.78 ± 0.09 | 1.63 ± 0.06 |
|            | CA                 |                           | 2.28 ± 0.13 | 2.41 ± 0.13 | 2.33 ± 0.20 | 2.38 ± 0.08 | 2.30 ± 0.05 |
|            | 2018               |                           |             |             |             |             |             |
|            | DCA                |                           | 3.25 ± 0.17 | 2.68 ± 0.13 | 2.82 ± 0.30 | 2.59 ± 0.14 | 2.58 ± 0.08 |
|            | ULO                | 3.38 ± 0.21               | 3.34 ± 0.37 | 2.92 ± 0.33 | 3.11 ± 0.49 | 3.02 ± 0.12 | 2.65 ± 0.13 |
|            | CA                 |                           | 3.53 ± 0.34 | 3.70 ± 0.22 | 3.62 ± 0.38 | 3.78 ± 0.03 | 3.59 ± 0.15 |
| Ananasnaya | 2017               |                           |             |             |             |             |             |
|            | DCA                |                           | 1.60 ± 0.12 | 1.29 ± 0.08 | 1.42 ± 0.13 | 1.42 ± 0.09 | 1.31 ± 0.03 |
|            | ULO                | 1.76 ± 0.05               | 1.71 ± 0.12 | 1.60 ± 0.10 | 1.65 ± 0.24 | 1.39 ± 0.08 | 1.21 ± 0.00 |
|            | CA                 |                           | 1.92 ± 0.16 | 1.89 ± 0.12 | 2.02 ± 0.25 | 1.90 ± 0.02 | 1.79 ± 0.04 |
|            | 2018               |                           |             |             |             |             |             |
|            | DCA                |                           | 1.75 ± 0.20 | 1.35 ± 0.04 | 1.46 ± 0.27 | 1.48 ± 0.30 | 1.33 ± 0.30 |
|            | ULO                | 1.59 ± 0.17               | 1.68 ± 0.27 | 1.57 ± 0.15 | 1.75 ± 0.08 | 1.67 ± 0.15 | 1.35 ± 0.12 |
|            | CA                 |                           | 1.74 ± 0.34 | 1.81 ± 0.15 | 2.10 ± 0.07 | 1.85 ± 0.23 | 2.00 ± 0.15 |

DCA, dynamic controlled atmosphere, 0.4% CO<sub>2</sub>:0.4% O<sub>2</sub>; ULO, ultra-low oxygen, 1.5% CO<sub>2</sub>:1.5% O<sub>2</sub>; CA, controlled atmosphere, 5% CO<sub>2</sub>:1.5% O<sub>2</sub>; data are presented as mean ± standard deviation.

**Table S5.** Changes in flavonols (mg ·100 g<sup>-1</sup> F.W.), measured in ‘Geneva’ and ‘Ananasnaya’ minikiwi fruit.

| Cultivars  | Storage<br>Condition<br>s | Period of Storage (Weeks) |             |             |             |             |             |
|------------|---------------------------|---------------------------|-------------|-------------|-------------|-------------|-------------|
|            |                           | 0                         | 4           | 6           | 8           | 10          | 12          |
| Geneva     | 2017                      |                           |             |             |             |             |             |
|            | DCA                       |                           | 1.63 ± 0.11 | 1.41 ± 0.07 | 1.51 ± 0.14 | 1.46 ± 0.10 | 1.49 ± 0.03 |
|            | ULO                       | 1.66 ± 0.06               | 1.56 ± 0.15 | 1.42 ± 0.03 | 1.58 ± 0.16 | 1.46 ± 0.05 | 1.37 ± 0.13 |
|            | CA                        |                           | 1.75 ± 0.03 | 1.85 ± 0.05 | 1.81 ± 0.22 | 1.75 ± 0.08 | 1.76 ± 0.08 |
|            | 2018                      |                           |             |             |             |             |             |
|            | DCA                       |                           | 1.21 ± 0.08 | 1.10 ± 0.04 | 1.15 ± 0.08 | 1.09 ± 0.04 | 1.08 ± 0.02 |
|            | ULO                       | 1.26 ± 0.03               | 1.20 ± 0.08 | 1.08 ± 0.02 | 1.18 ± 0.14 | 1.09 ± 0.03 | 1.03 ± 0.06 |
|            | CA                        |                           | 1.34 ± 0.05 | 1.35 ± 0.05 | 1.36 ± 0.17 | 1.32 ± 0.04 | 1.31 ± 0.03 |
|            | 2017                      |                           |             |             |             |             |             |
| Ananasnaya | DCA                       |                           | 5.36 ± 0.47 | 4.88 ± 0.21 | 5.20 ± 0.77 | 4.85 ± 0.22 | 4.39 ± 0.01 |
|            | ULO                       | 6.58 ± 0.55               | 5.82 ± 0.09 | 5.27 ± 0.43 | 6.20 ± 0.92 | 5.28 ± 0.09 | 5.20 ± 0.05 |
|            | CA                        |                           | 6.51 ± 0.40 | 6.27 ± 0.52 | 6.67 ± 1.08 | 6.40 ± 0.07 | 6.22 ± 0.18 |
|            | 2018                      |                           |             |             |             |             |             |
|            | DCA                       |                           | 5.32 ± 0.35 | 4.59 ± 0.25 | 5.20 ± 0.97 | 4.64 ± 0.28 | 4.32 ± 0.03 |
|            | ULO                       | 6.73 ± 0.74               | 5.44 ± 0.11 | 5.10 ± 0.66 | 6.17 ± 0.94 | 5.29 ± 0.29 | 5.48 ± 0.16 |
|            | CA                        |                           | 6.37 ± 0.52 | 6.19 ± 0.72 | 6.49 ± 0.98 | 6.32 ± 0.12 | 6.18 ± 0.23 |

DCA, dynamic controlled atmosphere, 0.4% CO<sub>2</sub>:0.4% O<sub>2</sub>; ULO, ultra-low oxygen, 1.5% CO<sub>2</sub>:1.5% O<sub>2</sub>; CA, controlled atmosphere, 5% CO<sub>2</sub>:1.5% O<sub>2</sub>; data are presented as mean ± standard deviation.

**Table S6.** Changes in flavan-3-ols (mg ·100 g<sup>-1</sup> F.W.), measured in ‘Geneva’ and ‘Ananasnaya’ minikiwi fruit.

| Cultivars  | Storage Conditions | Period of Storage (Weeks) |             |             |             |             |             |
|------------|--------------------|---------------------------|-------------|-------------|-------------|-------------|-------------|
|            |                    | 0                         | 4           | 6           | 8           | 10          | 12          |
| Geneva     | 2017               |                           |             |             |             |             |             |
|            | DCA                |                           | 0.42 ± 0.01 | 0.38 ± 0.03 | 0.42 ± 0.04 | 0.39 ± 0.01 | 0.38 ± 0.02 |
|            | ULO                | 0.50 ± 0.01               | 0.42 ± 0.03 | 0.39 ± 0.06 | 0.42 ± 0.05 | 0.38 ± 0.02 | 0.36 ± 0.02 |
|            | CA                 |                           | 0.47 ± 0.03 | 0.49 ± 0.05 | 0.47 ± 0.06 | 0.47 ± 0.03 | 0.49 ± 0.02 |
|            | 2018               |                           |             |             |             |             |             |
|            | DCA                |                           | 0.42 ± 0.02 | 0.39 ± 0.02 | 0.41 ± 0.05 | 0.38 ± 0.01 | 0.34 ± 0.03 |
|            | ULO                | 0.50 ± 0.01               | 0.41 ± 0.03 | 0.39 ± 0.05 | 0.43 ± 0.06 | 0.39 ± 0.01 | 0.37 ± 0.01 |
|            | CA                 |                           | 0.46 ± 0.03 | 0.50 ± 0.03 | 0.48 ± 0.06 | 0.50 ± 0.01 | 0.49 ± 0.00 |
| Ananasnaya | 2017               |                           |             |             |             |             |             |
|            | DCA                |                           | 0.47 ± 0.02 | 0.43 ± 0.02 | 0.42 ± 0.06 | 0.43 ± 0.02 | 0.40 ± 0.03 |
|            | ULO                | 0.54 ± 0.03               | 0.48 ± 0.03 | 0.46 ± 0.05 | 0.52 ± 0.08 | 0.40 ± 0.01 | 0.39 ± 0.02 |
|            | CA                 |                           | 0.55 ± 0.03 | 0.54 ± 0.03 | 0.57 ± 0.08 | 0.49 ± 0.00 | 0.51 ± 0.01 |
|            | 2018               |                           |             |             |             |             |             |
|            | DCA                |                           | 0.56 ± 0.01 | 0.49 ± 0.04 | 0.52 ± 0.09 | 0.46 ± 0.02 | 0.40 ± 0.02 |
|            | ULO                | 0.62 ± 0.06               | 0.53 ± 0.05 | 0.50 ± 0.07 | 0.57 ± 0.12 | 0.49 ± 0.02 | 0.47 ± 0.03 |
|            | CA                 |                           | 0.61 ± 0.03 | 0.62 ± 0.01 | 0.66 ± 0.01 | 0.60 ± 0.03 | 0.62 ± 0.01 |

DCA, dynamic controlled atmosphere, 0.4% CO<sub>2</sub>:0.4% O<sub>2</sub>; ULO, ultra-low oxygen, 1.5% CO<sub>2</sub>:1.5% O<sub>2</sub>; CA, controlled atmosphere, 5% CO<sub>2</sub>:1.5% O<sub>2</sub>; data are presented as mean ± standard deviation.

**Table S7.** Changes in glucose ( $\text{g} \cdot 100 \text{ g}^{-1} \text{ F.W.}$ ), measured in ‘Geneva’ and ‘Ananasnaya’ minikiwi fruit.

| Cultivars  | Storage Conditions | Period of Storage (Weeks) |                 |                 |                 |                 |                 |
|------------|--------------------|---------------------------|-----------------|-----------------|-----------------|-----------------|-----------------|
|            |                    | 0                         | 4               | 6               | 8               | 10              | 12              |
| Geneva     | 2017               |                           |                 |                 |                 |                 |                 |
|            | DCA                |                           | $2.66 \pm 0.10$ | $3.04 \pm 0.02$ | $3.63 \pm 0.00$ | $3.47 \pm 0.01$ | $3.25 \pm 0.03$ |
|            | ULO                | $1.91 \pm 0.04$           | $2.71 \pm 0.19$ | $3.11 \pm 0.06$ | $3.69 \pm 0.05$ | $3.74 \pm 0.12$ | $3.89 \pm 0.05$ |
|            | CA                 |                           | $2.66 \pm 0.09$ | $2.92 \pm 0.06$ | $3.39 \pm 0.03$ | $3.55 \pm 0.02$ | $3.61 \pm 0.06$ |
|            | 2018               |                           |                 |                 |                 |                 |                 |
|            | DCA                |                           | $2.55 \pm 0.45$ | $2.90 \pm 0.08$ | $3.55 \pm 0.02$ | $3.46 \pm 0.10$ | $3.55 \pm 0.04$ |
|            | ULO                | $2.02 \pm 0.08$           | $2.86 \pm 0.16$ | $3.28 \pm 0.04$ | $3.74 \pm 0.02$ | $3.61 \pm 0.02$ | $3.55 \pm 0.05$ |
|            | CA                 |                           | $2.50 \pm 0.10$ | $2.75 \pm 0.12$ | $3.36 \pm 0.08$ | $3.46 \pm 0.05$ | $3.67 \pm 0.07$ |
| Ananasnaya | 2017               |                           |                 |                 |                 |                 |                 |
|            | DCA                |                           | $2.04 \pm 0.04$ | $2.43 \pm 0.02$ | $2.83 \pm 0.04$ | $2.75 \pm 0.03$ | $2.75 \pm 0.01$ |
|            | ULO                | $1.55 \pm 0.04$           | $2.35 \pm 0.08$ | $2.67 \pm 0.04$ | $2.74 \pm 0.04$ | $2.69 \pm 0.03$ | $2.49 \pm 0.02$ |
|            | CA                 |                           | $2.11 \pm 0.05$ | $2.37 \pm 0.03$ | $2.85 \pm 0.05$ | $3.01 \pm 0.01$ | $3.08 \pm 0.01$ |
|            | 2018               |                           |                 |                 |                 |                 |                 |
|            | DCA                |                           | $1.86 \pm 0.08$ | $2.26 \pm 0.02$ | $2.72 \pm 0.02$ | $2.69 \pm 0.02$ | $2.83 \pm 0.05$ |
|            | ULO                | $1.52 \pm 0.03$           | $2.12 \pm 0.10$ | $2.44 \pm 0.06$ | $2.84 \pm 0.03$ | $2.85 \pm 0.04$ | $2.91 \pm 0.06$ |
|            | CA                 |                           | $1.94 \pm 0.03$ | $2.16 \pm 0.04$ | $2.78 \pm 0.06$ | $2.83 \pm 0.05$ | $3.03 \pm 0.06$ |

DCA, dynamic controlled atmosphere, 0.4% CO<sub>2</sub>:0.4% O<sub>2</sub>; ULO, ultra-low oxygen, 1.5% CO<sub>2</sub>:1.5% O<sub>2</sub>; CA, controlled atmosphere, 5% CO<sub>2</sub>:1.5% O<sub>2</sub>; data are presented as mean  $\pm$  standard deviation.

**Table S8.** Changes in fructose ( $\text{g} \cdot 100 \text{ g}^{-1}$  F.W.), measured in ‘Geneva’ and ‘Ananasnaya’ minikiwi fruit.

| Cultivars  | Storage Conditions | Period of Storage (Weeks) |             |             |             |             |             |
|------------|--------------------|---------------------------|-------------|-------------|-------------|-------------|-------------|
|            |                    | 0                         | 4           | 6           | 8           | 10          | 12          |
| Geneva     | 2017               |                           |             |             |             |             |             |
|            | DCA                | 2.30 ± 0.03               | 2.93 ± 0.15 | 3.12 ± 0.09 | 3.56 ± 0.07 | 3.59 ± 0.05 | 3.62 ± 0.06 |
|            | ULO                |                           | 3.00 ± 0.07 | 3.39 ± 0.09 | 3.94 ± 0.09 | 3.95 ± 0.07 | 4.17 ± 0.06 |
|            | CA                 |                           | 2.87 ± 0.02 | 3.07 ± 0.02 | 3.51 ± 0.03 | 3.58 ± 0.04 | 3.70 ± 0.07 |
|            | 2018               |                           |             |             |             |             |             |
|            | DCA                | 2.53 ± 0.04               | 3.21 ± 0.14 | 3.47 ± 0.09 | 4.03 ± 0.06 | 4.03 ± 0.07 | 4.09 ± 0.07 |
|            | ULO                |                           | 3.32 ± 0.10 | 3.76 ± 0.09 | 4.40 ± 0.08 | 4.42 ± 0.09 | 4.65 ± 0.05 |
|            | CA                 |                           | 2.15 ± 0.03 | 3.39 ± 0.05 | 3.93 ± 0.03 | 4.02 ± 0.04 | 4.18 ± 0.07 |
| Ananasnaya | 2017               |                           |             |             |             |             |             |
|            | DCA                | 2.20 ± 0.07               | 2.89 ± 0.05 | 3.17 ± 0.05 | 3.63 ± 0.07 | 3.50 ± 0.06 | 3.43 ± 0.03 |
|            | ULO                |                           | 3.17 ± 0.10 | 3.53 ± 0.03 | 3.53 ± 0.04 | 3.47 ± 0.03 | 3.17 ± 0.02 |
|            | CA                 |                           | 2.88 ± 0.05 | 3.13 ± 0.07 | 3.66 ± 0.06 | 3.94 ± 0.05 | 4.13 ± 0.06 |
|            | 2018               |                           |             |             |             |             |             |
|            | DCA                | 1.98 ± 0.05               | 2.49 ± 0.07 | 2.72 ± 0.06 | 3.17 ± 0.10 | 3.16 ± 0.03 | 3.22 ± 0.04 |
|            | ULO                |                           | 2.66 ± 0.06 | 2.98 ± 0.05 | 3.36 ± 0.05 | 3.31 ± 0.05 | 3.33 ± 0.06 |
|            | CA                 |                           | 2.46 ± 0.07 | 2.66 ± 0.08 | 3.22 ± 0.10 | 3.34 ± 0.05 | 3.55 ± 0.05 |

DCA, dynamic controlled atmosphere, 0.4% CO<sub>2</sub>:0.4% O<sub>2</sub>; ULO, ultra-low oxygen, 1.5% CO<sub>2</sub>:1.5% O<sub>2</sub>; CA, controlled atmosphere, 5% CO<sub>2</sub>:1.5% O<sub>2</sub>; data are presented as mean  $\pm$  standard deviation.

**Table S9.** Changes in sucrose ( $\text{g} \cdot 100 \text{ g}^{-1} \text{ F.W.}$ ), measured in ‘Geneva’ and ‘Ananasnaya’ minikiwi fruit.

| Cultivars  | Storage Conditions | Period of Storage (Weeks) |                 |                 |                 |                 |                 |
|------------|--------------------|---------------------------|-----------------|-----------------|-----------------|-----------------|-----------------|
|            |                    | 0                         | 4               | 6               | 8               | 10              | 12              |
| Geneva     | 2017               |                           |                 |                 |                 |                 |                 |
|            | DCA                |                           | $7.02 \pm 0.36$ | $6.50 \pm 0.20$ | $7.48 \pm 0.18$ | $7.17 \pm 0.24$ | $7.16 \pm 0.35$ |
|            | ULO                | $8.45 \pm 0.31$           | $6.52 \pm 0.29$ | $5.53 \pm 0.28$ | $6.98 \pm 0.40$ | $6.46 \pm 0.28$ | $5.58 \pm 0.34$ |
|            | CA                 |                           | $7.50 \pm 0.50$ | $6.77 \pm 0.05$ | $7.86 \pm 0.12$ | $7.79 \pm 0.22$ | $7.39 \pm 0.32$ |
|            | 2018               |                           |                 |                 |                 |                 |                 |
|            | DCA                |                           | $6.93 \pm 0.40$ | $6.69 \pm 0.29$ | $6.72 \pm 0.17$ | $6.46 \pm 0.15$ | $6.27 \pm 0.23$ |
|            | ULO                | $8.00 \pm 0.32$           | $6.72 \pm 0.15$ | $6.14 \pm 0.21$ | $6.37 \pm 0.21$ | $5.90 \pm 0.09$ | $5.55 \pm 0.15$ |
|            | CA                 |                           | $7.34 \pm 0.34$ | $6.79 \pm 0.09$ | $7.04 \pm 0.15$ | $6.86 \pm 0.22$ | $6.52 \pm 0.25$ |
| Ananasnaya | 2017               |                           |                 |                 |                 |                 |                 |
|            | DCA                |                           | $4.93 \pm 0.33$ | $3.96 \pm 0.20$ | $3.93 \pm 0.32$ | $3.99 \pm 0.10$ | $4.05 \pm 0.33$ |
|            | ULO                | $6.67 \pm 0.03$           | $4.11 \pm 0.23$ | $3.60 \pm 0.38$ | $3.50 \pm 0.30$ | $3.25 \pm 0.13$ | $2.70 \pm 0.30$ |
|            | CA                 |                           | $5.45 \pm 0.30$ | $4.46 \pm 0.16$ | $5.42 \pm 0.40$ | $4.86 \pm 0.05$ | $4.44 \pm 0.33$ |
|            | 2018               |                           |                 |                 |                 |                 |                 |
|            | DCA                |                           | $5.57 \pm 0.18$ | $4.89 \pm 0.10$ | $4.70 \pm 0.19$ | $4.46 \pm 0.09$ | $4.37 \pm 0.20$ |
|            | ULO                | $6.64 \pm 0.04$           | $5.00 \pm 0.13$ | $4.24 \pm 0.09$ | $4.29 \pm 0.11$ | $4.05 \pm 0.11$ | $3.57 \pm 0.18$ |
|            | CA                 |                           | $5.95 \pm 0.20$ | $5.24 \pm 0.18$ | $5.55 \pm 0.25$ | $5.21 \pm 0.05$ | $4.94 \pm 0.16$ |

DCA, dynamic controlled atmosphere, 0.4% CO<sub>2</sub>:0.4% O<sub>2</sub>; ULO, ultra-low oxygen, 1.5% CO<sub>2</sub>:1.5% O<sub>2</sub>; CA, controlled atmosphere, 5% CO<sub>2</sub>:1.5% O<sub>2</sub>; data are presented as mean  $\pm$  standard deviation.

**Table S10.** Changes in citric acid ( $\text{g} \cdot 100 \text{ g}^{-1} \text{ F.W.}$ ), measured in ‘Geneva’ and ‘Ananasnaya’ minikiwi fruit.

| Cultivars  | Storage<br>Condition<br>s | Period of Storage (Weeks) |                   |                   |                   |                   |                   |
|------------|---------------------------|---------------------------|-------------------|-------------------|-------------------|-------------------|-------------------|
|            |                           | 0                         | 4                 | 6                 | 8                 | 10                | 12                |
| Geneva     | 2017                      |                           |                   |                   |                   |                   |                   |
|            | DCA                       |                           | $0.950 \pm 0.087$ | $0.793 \pm 0.085$ | $0.746 \pm 0.047$ | $0.744 \pm 0.020$ | $0.625 \pm 0.058$ |
|            | ULO                       | $1.145 \pm 0.09$          | $0.819 \pm 0.093$ | $0.794 \pm 0.082$ | $0.770 \pm 0.052$ | $0.589 \pm 0.071$ | $0.628 \pm 0.086$ |
|            | CA                        |                           | $0.885 \pm 0.048$ | $0.786 \pm 0.104$ | $0.855 \pm 0.020$ | $0.849 \pm 0.037$ | $0.727 \pm 0.057$ |
|            | 2018                      |                           |                   |                   |                   |                   |                   |
|            | DCA                       |                           | $0.731 \pm 0.016$ | $0.695 \pm 0.014$ | $0.659 \pm 0.016$ | $0.606 \pm 0.004$ | $0.525 \pm 0.021$ |
|            | ULO                       | $0.871 \pm 0.01$          | $0.694 \pm 0.019$ | $0.679 \pm 0.030$ | $0.611 \pm 0.021$ | $0.579 \pm 0.031$ | $0.520 \pm 0.020$ |
|            | CA                        |                           | $0.790 \pm 0.027$ | $0.716 \pm 0.055$ | $0.687 \pm 0.015$ | $0.661 \pm 0.023$ | $0.648 \pm 0.017$ |
| Ananasnaya | 2017                      |                           |                   |                   |                   |                   |                   |
|            | DCA                       |                           | $0.668 \pm 0.004$ | $0.572 \pm 0.017$ | $0.551 \pm 0.030$ | $0.542 \pm 0.041$ | $0.486 \pm 0.015$ |
|            | ULO                       | $0.739 \pm 0.02$          | $0.590 \pm 0.046$ | $0.556 \pm 0.018$ | $0.503 \pm 0.015$ | $0.443 \pm 0.007$ | $0.334 \pm 0.035$ |
|            | CA                        |                           | $0.676 \pm 0.028$ | $0.659 \pm 0.044$ | $0.613 \pm 0.035$ | $0.580 \pm 0.053$ | $0.550 \pm 0.008$ |
|            | 2018                      |                           |                   |                   |                   |                   |                   |
|            | DCA                       |                           | $0.734 \pm 0.012$ | $0.672 \pm 0.026$ | $0.692 \pm 0.059$ | $0.637 \pm 0.072$ | $0.537 \pm 0.024$ |
|            | ULO                       | $0.884 \pm 0.06$          | $0.713 \pm 0.017$ | $0.677 \pm 0.049$ | $0.568 \pm 0.039$ | $0.476 \pm 0.004$ | $0.421 \pm 0.066$ |
|            | CA                        |                           | $0.781 \pm 0.046$ | $0.794 \pm 0.074$ | $0.717 \pm 0.050$ | $0.729 \pm 0.053$ | $0.688 \pm 0.009$ |

DCA, dynamic controlled atmosphere, 0.4% CO<sub>2</sub>:0.4% O<sub>2</sub>; ULO, ultra-low oxygen, 1.5% CO<sub>2</sub>:1.5% O<sub>2</sub>; CA, controlled atmosphere, 5% CO<sub>2</sub>:1.5% O<sub>2</sub>; data are presented as mean  $\pm$  standard deviation.

**Table S11.** Changes in malic acid ( $\text{g} \cdot 100 \text{ g}^{-1}$  F.W.), measured in ‘Geneva’ and ‘Ananasnaya’ minikiwi fruit.

| Cultivars  | Storage<br>Condition<br>s | Period of Storage (Weeks) |                   |                   |                   |                   |                   |
|------------|---------------------------|---------------------------|-------------------|-------------------|-------------------|-------------------|-------------------|
|            |                           | 0                         | 4                 | 6                 | 8                 | 10                | 12                |
| Geneva     | 2017                      |                           |                   |                   |                   |                   |                   |
|            | DCA                       |                           | $0.124 \pm 0.018$ | $0.113 \pm 0.004$ | $0.108 \pm 0.011$ | $0.093 \pm 0.004$ | $0.083 \pm 0.012$ |
|            | ULO                       | $0.150 \pm 0.01$          | $0.108 \pm 0.003$ | $0.113 \pm 0.018$ | $0.108 \pm 0.002$ | $0.088 \pm 0.011$ | $0.081 \pm 0.007$ |
|            | CA                        |                           | $0.127 \pm 0.005$ | $0.130 \pm 0.019$ | $0.118 \pm 0.006$ | $0.122 \pm 0.008$ | $0.107 \pm 0.010$ |
|            | 2018                      |                           |                   |                   |                   |                   |                   |
|            | DCA                       |                           | $0.117 \pm 0.010$ | $0.115 \pm 0.002$ | $0.109 \pm 0.006$ | $0.097 \pm 0.016$ | $0.077 \pm 0.007$ |
|            | ULO                       | $0.131 \pm 0.01$          | $0.103 \pm 0.008$ | $0.103 \pm 0.005$ | $0.102 \pm 0.006$ | $0.082 \pm 0.014$ | $0.059 \pm 0.005$ |
|            | CA                        |                           | $0.120 \pm 0.013$ | $0.124 \pm 0.006$ | $0.110 \pm 0.009$ | $0.109 \pm 0.014$ | $0.104 \pm 0.013$ |
| Ananasnaya | 2017                      |                           |                   |                   |                   |                   |                   |
|            | DCA                       |                           | $0.188 \pm 0.023$ | $0.180 \pm 0.018$ | $0.140 \pm 0.013$ | $0.169 \pm 0.017$ | $0.140 \pm 0.009$ |
|            | ULO                       | $0.220 \pm 0.020$         | $0.188 \pm 0.017$ | $0.150 \pm 0.013$ | $0.137 \pm 0.028$ | $0.134 \pm 0.016$ | $0.105 \pm 0.009$ |
|            | CA                        |                           | $0.238 \pm 0.012$ | $0.260 \pm 0.005$ | $0.174 \pm 0.006$ | $0.201 \pm 0.018$ | $0.183 \pm 0.027$ |
|            | 2018                      |                           |                   |                   |                   |                   |                   |
|            | DCA                       |                           | $0.117 \pm 0.003$ | $0.104 \pm 0.006$ | $0.083 \pm 0.003$ | $0.081 \pm 0.008$ | $0.075 \pm 0.007$ |
|            | ULO                       | $0.127 \pm 0.01$          | $0.103 \pm 0.008$ | $0.085 \pm 0.006$ | $0.072 \pm 0.004$ | $0.060 \pm 0.003$ | $0.056 \pm 0.009$ |
|            | CA                        |                           | $0.125 \pm 0.006$ | $0.132 \pm 0.006$ | $0.097 \pm 0.004$ | $0.097 \pm 0.006$ | $0.096 \pm 0.008$ |

DCA, dynamic controlled atmosphere, 0.4% CO<sub>2</sub>:0.4% O<sub>2</sub>; ULO, ultra-low oxygen, 1.5% CO<sub>2</sub>:1.5% O<sub>2</sub>; CA, controlled atmosphere, 5% CO<sub>2</sub>:1.5% O<sub>2</sub>; data are presented as mean  $\pm$  standard deviation.
